# Supplementary material for: Effects of incubator oxygen and carbon dioxide concentrations on hatchability of fertile eggs, some blood parameters, and histopathological changes of broilers with different parental stock ages in high altitude
Source: PubMed Central journal article supplement (PMC8703081; doi:10.1016/j.psj.2021.101609), 2021-11-19
Supplement: mmc1.pdf [file mmc1.pdf]

ABANT İZZET BAYSAL ÜNİVERSİTESİ

Hayvan Araştırmaları Yerel Etik Kurulu

Sayı : 32

04.05.2018

Konu: Kararlar

|                                                |                                                 |                                                                                                                                |
|------------------------------------------------|-------------------------------------------------|--------------------------------------------------------------------------------------------------------------------------------|
| BAŞVURU BİLGİLERİ<br>(APPLICATION INFORMATION) | ARAŞTIRMANIN ADI<br>(TITLE OF THE PROJECT)      | Damızlık Yaşı ile Kuluçka Makinesindeki Karbondioksit ve Oksijen Seviyesinin Etlik Piliçlerde Embriyo Gelişimine etkileri..    |
|                                                | SORUMLU ARAŞTIRMACI<br>(PRINCIPAL INVESTIGATOR) | Dr.Öğr.Üyesi Nezh OKUR                                                                                                         |
|                                                | DİĞER ARAŞTIRMACILAR<br>(OTHER INVESTIGATORS)   | Dr.Öğr.Üyesi S.Arda ERATALAR, Prof.Dr.Şule Yurdağül ÖZSOY, Prof.Dr.Ayşe Arzu YİĞİT, Dr.Öğr.Üyesi Ruhi KABAKÇI, Dr.Tuncer KUTLU |
|                                                | ARAŞTIRMA MERKEZİ<br>(RESEARCH CENTER)          | AİBÜ Deney Hayvanlar Uygulama ve Araştırma Merkezi                                                                             |

|                     |                                                                                                                                                                                                                                                                                                              |                          |
|---------------------|--------------------------------------------------------------------------------------------------------------------------------------------------------------------------------------------------------------------------------------------------------------------------------------------------------------|--------------------------|
| KARAR<br>(DECISION) | Karar no (Decision No):2018/20                                                                                                                                                                                                                                                                               | Tarih (Date): 16.05.2018 |
|                     | Dr.Öğr.Üyesi Nezh OKUR ,un sorumluluğunda yapılması tasarlanan ve yukarıda başvuru bilgileri verilen araştırma dosyası ve ilgili belgelerin incelenmesi sonucunda araştırmanın 72 adet civciv ile gerçekleştirilmesinde etik yönden sakınca olmadığına mevcudun oy birliği/oy çokluğu ile karar verilmiştir. |                          |

| Üyeler                                               | Uzmanlık Alanı                                 | Kurumu                                               | İmza |
|------------------------------------------------------|------------------------------------------------|------------------------------------------------------|------|
| Prof. Dr. Erol AYAZ<br>(Başkan Yrd.)                 | Tıbbi Parazitoloji AD<br>Öğretim Üyesi         | AİBÜ Tıp Fakültesi                                   |      |
| Prof. Dr. Hamit COŞKUN<br>(Üye)                      | Psikoloji Bölümü<br>Öğretim Üyesi              | AİBÜ Fen Edebiyat Fakültesi                          |      |
| Prof. Dr. Neriman ŞENGÜL<br>(Invivo Üye)             | Genel Cer. AD Öğretim Üyesi                    | AİBÜ Tıp Fakültesi                                   |      |
| Prof.Dr. Dr. Ali Rıza GEZİCİ<br>(Üye)                | Beyin Cer. AD Öğretim Üyesi                    | AİBÜ Tıp Fakültesi                                   |      |
| Doç. Dr. Fatih ULAŞ<br>(Üye)                         | Göz Hastalıkları AD Öğretim Üyesi              | AİBÜ Tıp Fakültesi                                   |      |
| Doç. Dr. Mustafa ŞİT<br>(Üye)                        | Genel Cer. AD Öğretim Üyesi                    | AİBÜ Tıp Fakültesi                                   |      |
| Doç. Dr. Orçun TOPTAŞ<br>(Üye)                       | Cerrahi AD Öğretim Üyesi                       | AİBÜ Diş Hek. Fakültesi                              |      |
| Doç. Dr. Yeşim YENER<br>(Üye)                        | AİBÜ Temel Eğitim Bölümü Öğretim Üyesi         | AİBÜ Eğitim Fakültesi                                |      |
| Doç. Dr. Eray KEMAHLI<br>(Üye)                       | Üroloji AD Öğretim. Üyesi                      | AİBÜ Tıp Fakültesi                                   |      |
| Dr.Öğr.Üyesi Serdar GÖZÜTOK<br>(Üye)                 | Yaban Hayatı ve Ekolojisi Bölümü Öğretim Üyesi | AİBÜ Ziraat ve Doğa Bilimleri Fakültesi              |      |
| Dr. Öğr. Üyesi Hayriye ORALLAR<br>(Üye)              | Kanatlı Hayvan Yetiştiriciliği Bölümü          | AİBÜ Ziraat ve Doğa Bilimleri Fakültesi              |      |
| Dr. Öğr. Üyesi Ayhan ÇETİNKAYA<br>(Üye)              | Fizyoloji AD Öğretim Üyesi                     | AİBÜ Tıp Fakültesi                                   |      |
| Vetr. Hek. Enes EĞİLMEZ<br>(Sorumlu Veteriner Hekim) | Veteriner Hekim                                | AİBÜ Deney Hayvanları Uygulama. ve Araştırma Merkezi |      |
| Vet. Hek. Orhan BULUT<br>(TC Üyesi)                  | Veteriner Hekim                                | BOLU BEYPİLİÇ AŞ.                                    |      |
| Av.Cihan YAVUZ<br>(TC Üyesi)                         | Avukat                                         | Tabaklar mah. İzzet Baysal cad. No:6<br>BOLU         |      |
